# Supplementary material for: A Ce(iii) complex potently inhibits the activity and expression of tyrosine phosphatase SHP-2
Source: Royal Society of Chemistry journal article supplement (doi:10.1039/c9dt03200b), 2019-01-01
Supplement: c9dt03200b1.pdf [file c9dt03200b1.pdf]

## Supporting Information

### A Ce(III) complex potently inhibits the activity and expression of tyrosine phosphatase SHP-2

Lixia Lin<sup>a</sup>, Liping Lu<sup>a\*</sup>, Ran Du<sup>a</sup>, Caixia Yuan<sup>a</sup>, Miaoli Zhu<sup>a\*</sup>, Xueqi Fu<sup>b</sup>, Shu Xing<sup>b\*</sup>

<sup>a</sup>Institute of Molecular Science, Key Laboratory of Chemical Biology and Molecular Engineering of the Education Ministry, Shanxi University, Taiyuan, Shanxi, 030006, People's Republic of China. \*E-mail: [luliping@sxu.edu.cn](mailto:luliping@sxu.edu.cn); [miaoli@sxu.edu.cn](mailto:miaoli@sxu.edu.cn).

<sup>b</sup>Edmond H. Fischer Signal Transduction Laboratory, School of Life Sciences, Jilin University, Changchun, 130023, People's Republic of China. \*E-mail: [xingshu@jlu.edu.cn](mailto:xingshu@jlu.edu.cn).

**Fig. S1** The ESI-MS characterization data of Ce(III) complexes **1-4**.

**Fig. S2** The IR characterization data of Ce(III) complexes **1-4**.

**Fig. S3** The stabilities of complexes **1**, **2** and **4** in MOPS/DMSO = 9/1 (v/v) solution.

**Table S1** Crystal data and structure refinement parameters for complex **1**.

**Table S2** Selected bond lengths (Å) and bond angles (°) for complex **1**.

**Table S3** Selected hydrogen-bond geometry (Å, °) for complex **1**.

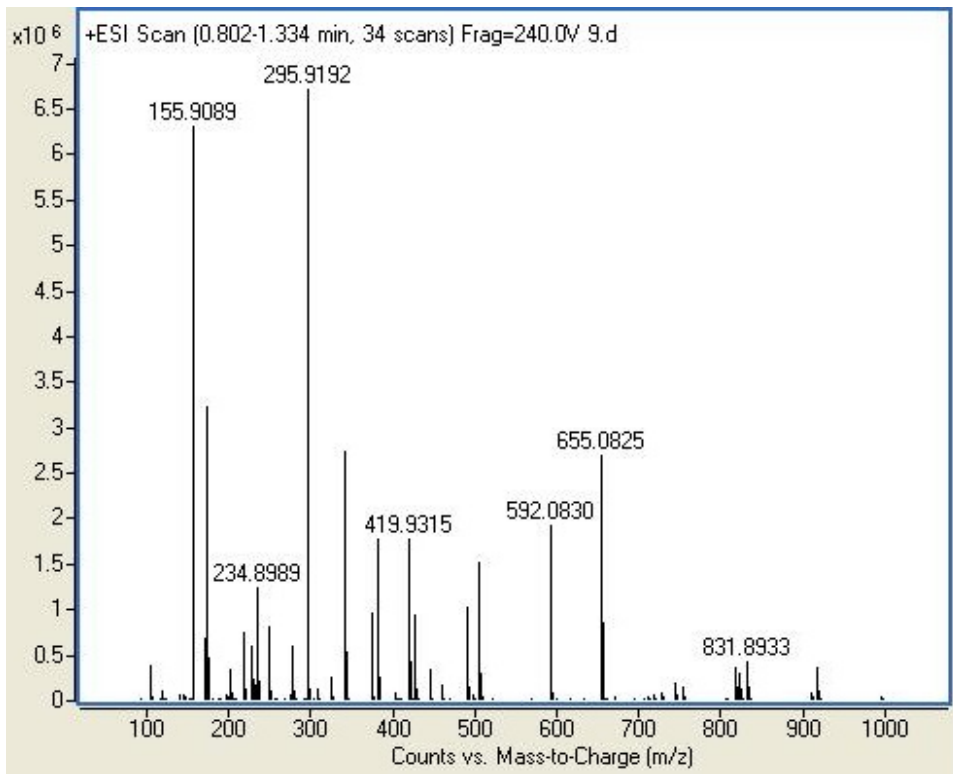

(a)

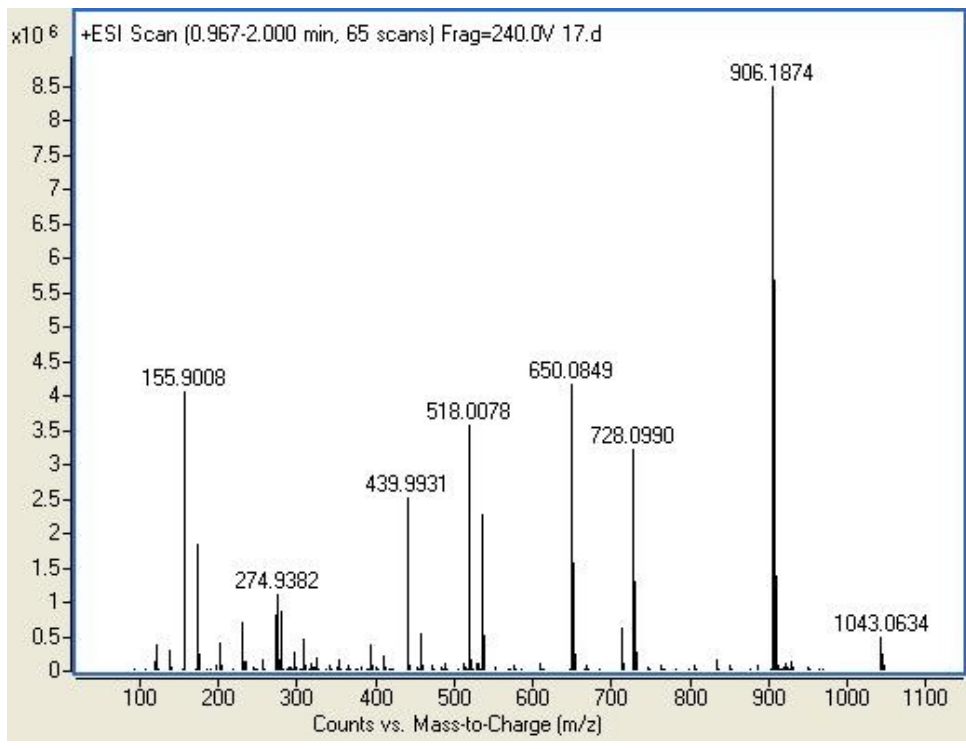

(b)

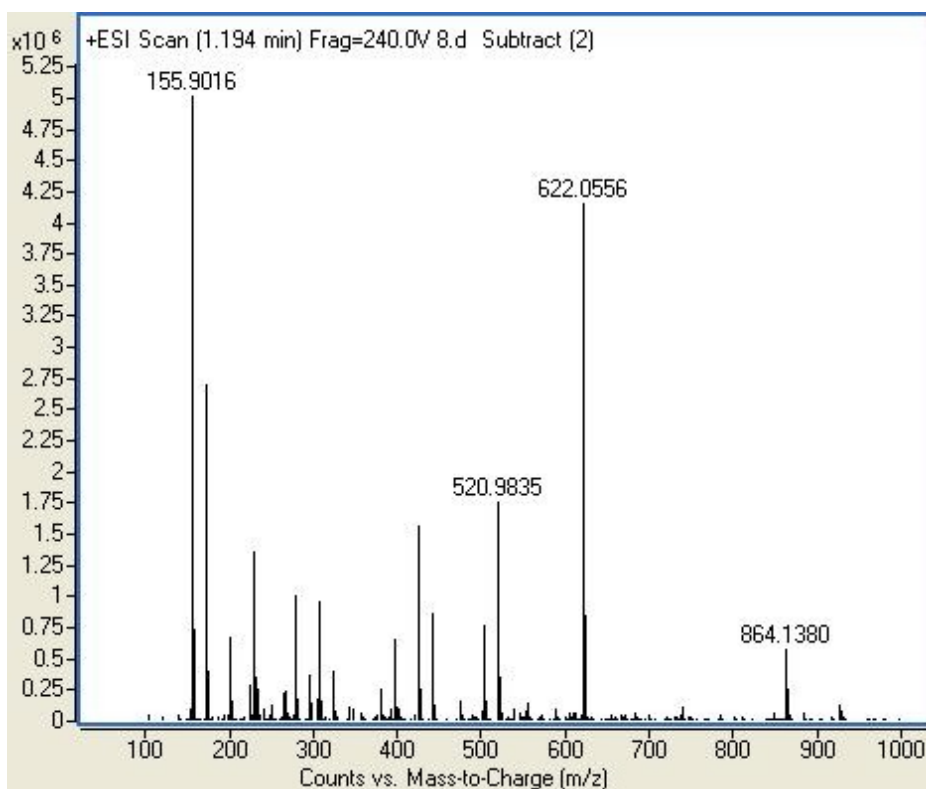

(c)

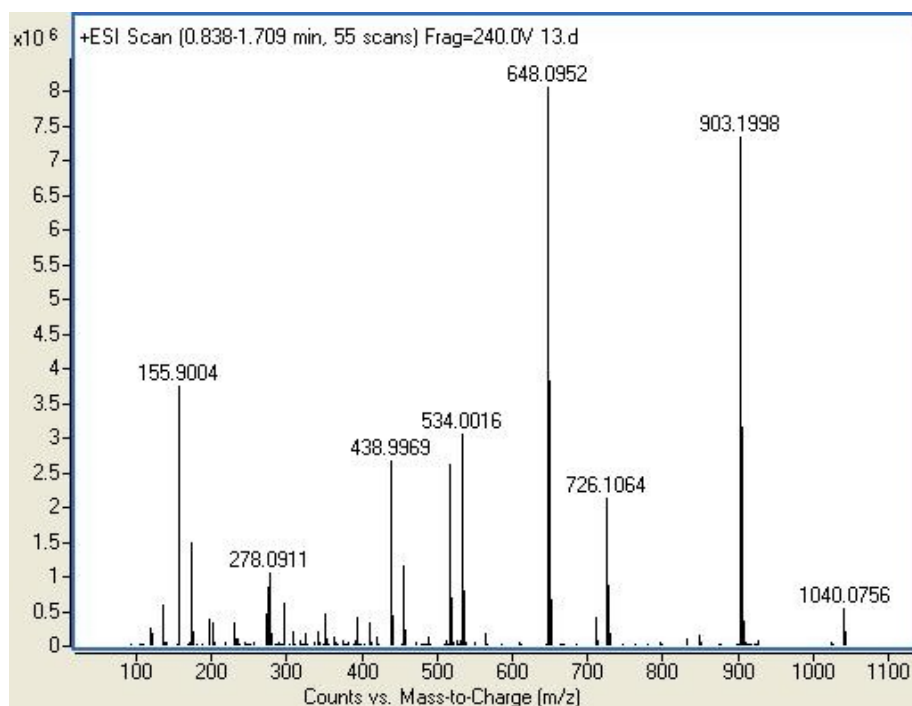

(d)

**Fig. S1** The ESI-MS characterization data of Ce(III) complexes **1-4**. (a) ESI-MS:  $m/z$ , [1-2NO<sub>3</sub>-H-2CH<sub>3</sub>OH]<sup>+</sup> calculated for C<sub>22</sub>H<sub>17</sub>CeN<sub>11</sub>O<sub>5</sub><sup>+</sup>: 655.05; measured: 655.08. (b) ESI-MS:  $m/z$ , [2-NO<sub>3</sub>-2H-3H<sub>2</sub>O]<sup>2+</sup> calculated for C<sub>26</sub>H<sub>22</sub>CeN<sub>8</sub>O<sub>4</sub><sup>2+</sup>: 650.08; measured: 650.08. (c) ESI-MS:  $m/z$ , [3-Br-NO<sub>3</sub>-H-H<sub>2</sub>O+CH<sub>3</sub>OH]<sup>+</sup> calculated for C<sub>25</sub>H<sub>22</sub>CeN<sub>8</sub>O<sub>3</sub><sup>+</sup>: 622.09; measured: 622.06. (d) ESI-MS:  $m/z$ , [4-NO<sub>3</sub>-2H-3H<sub>2</sub>O]<sup>2+</sup> calculated for C<sub>28</sub>H<sub>24</sub>CeN<sub>6</sub>O<sub>4</sub><sup>2+</sup>: 648.09; measured: 648.10.

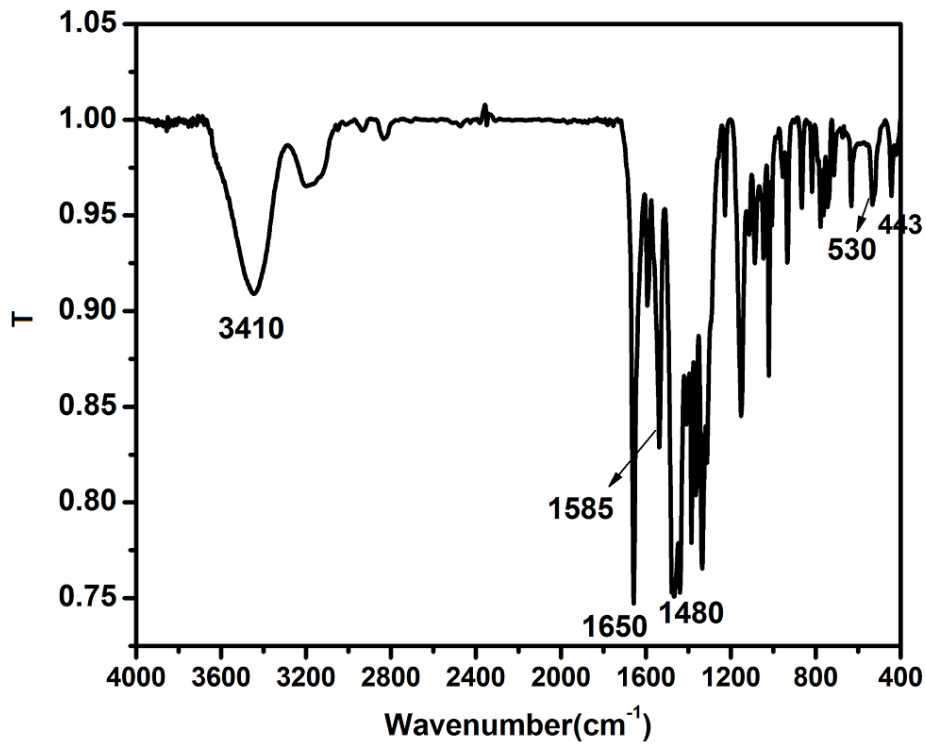

(a)

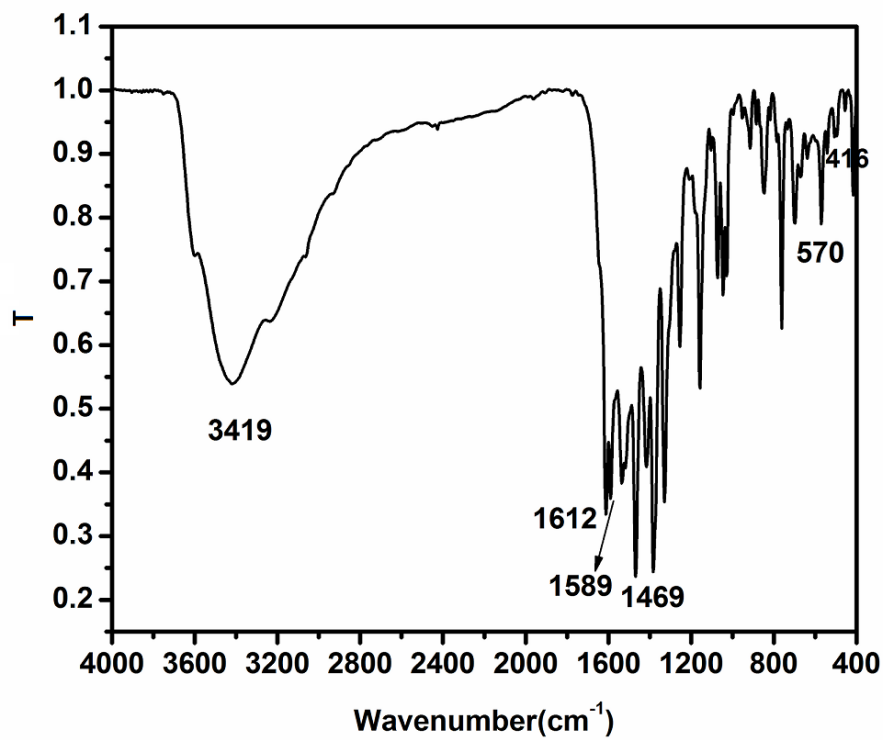

(b)

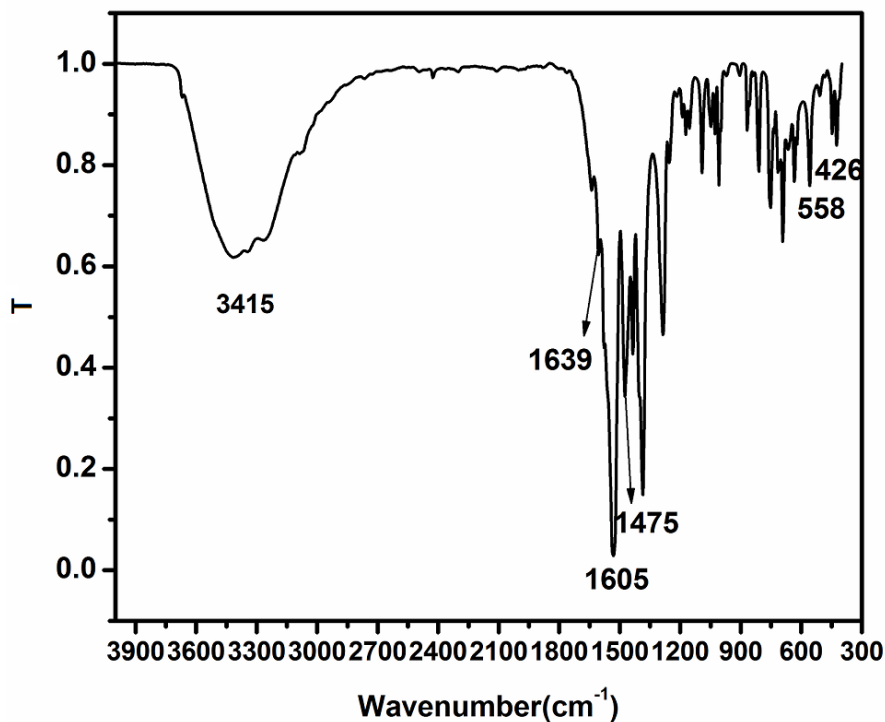

(c)

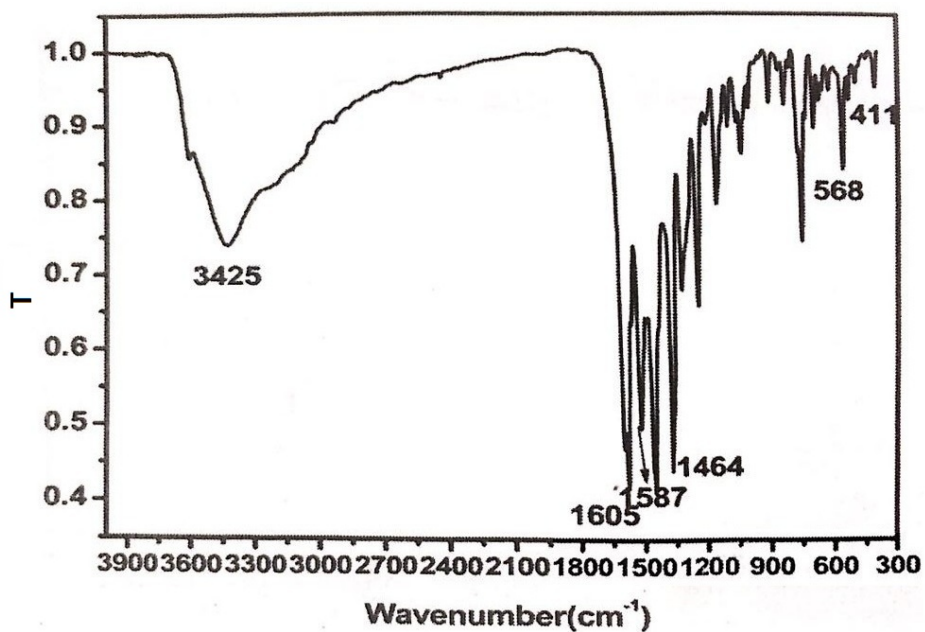

(d)

**Fig. S2** The IR characterization data of Ce(III) complexes **1-4**. IR ( $\nu/\text{cm}^{-1}$ , “s” stands for strong, “m” stands for medium, “w” stands for weak). (a) Infrared spectra of complex **1**,  $\nu_{(\text{O-H, N-H})}$  3410s,  $\nu_{(\text{C=O})}$  1650s,  $\nu_{(\text{C=N})}$  1585s,  $\nu_{(\text{NO}_3^-)}$  1480s,  $\nu_{(\text{Ce-N})}$  443s,  $\nu_{(\text{Ce-O})}$  530s. (b) Infrared spectra of complex **2**,  $\nu_{(\text{O-H, N-H})}$  3419s,  $\nu_{(\text{C=O})}$  1612s,  $\nu_{(\text{C=N})}$  1589s,  $\nu_{(\text{NO}_3^-)}$  1469s,  $\nu_{(\text{Ce-N})}$  416s,  $\nu_{(\text{Ce-O})}$  570s. (c) Infrared spectra of complex **3**,  $\nu_{(\text{O-H, N-H})}$  3415s,  $\nu_{(\text{C=O})}$  1639s,  $\nu_{(\text{C=N})}$  1605s,  $\nu_{(\text{NO}_3^-)}$  1475s,  $\nu_{(\text{Ce-N})}$  426s,  $\nu_{(\text{Ce-O})}$  558s. (d) Infrared spectra of complex **4**,  $\nu_{(\text{O-H, N-H})}$  3425s,  $\nu_{(\text{C=O})}$  1605s,  $\nu_{(\text{C=N})}$  1587s,  $\nu_{(\text{NO}_3^-)}$  1464s,  $\nu_{(\text{Ce-N})}$  411s,  $\nu_{(\text{Ce-O})}$  568s.

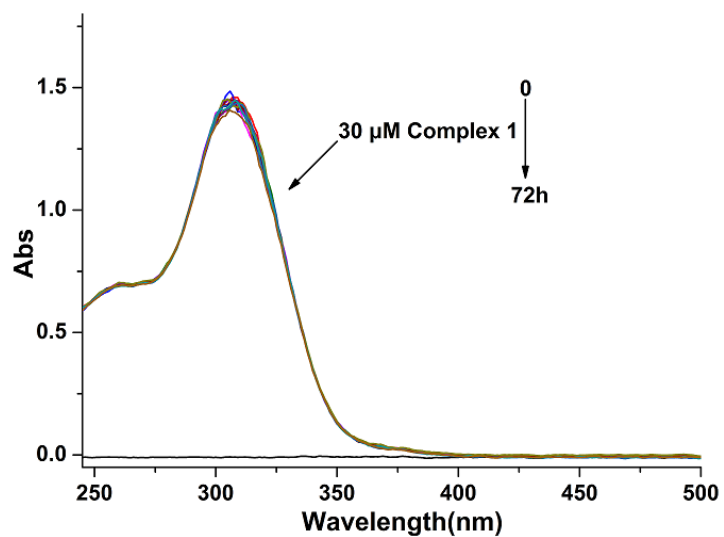

(a)

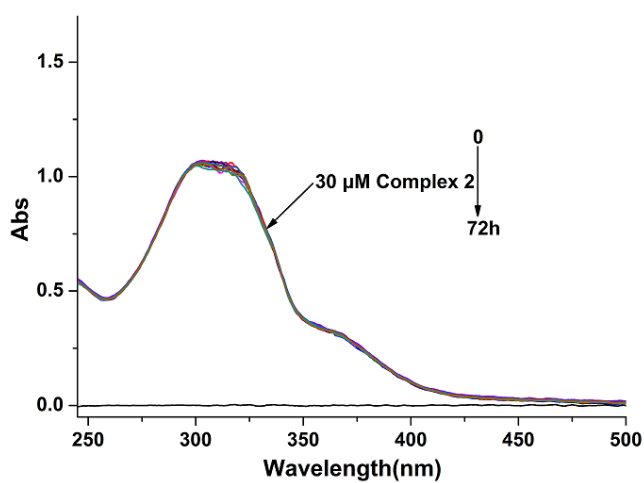

(b)

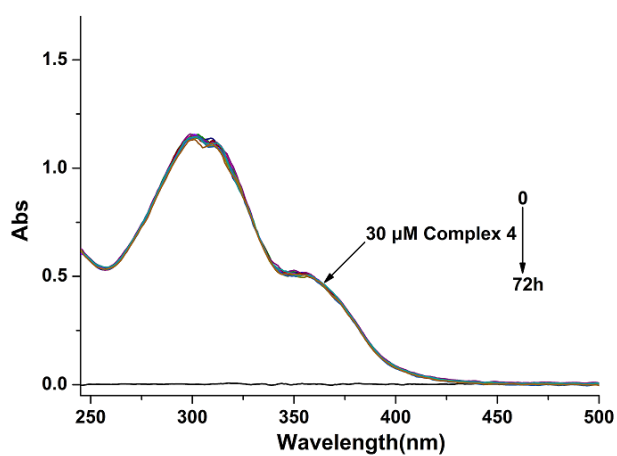

(c)

**Fig. S3** The UV-vis absorption spectra of complex 1(a), complex 2(b), and complex 4(c) recorded at 310 K in 2 mL MOPS/DMSO = 9/1 (v/v) solution, time scale: 0–72 h.

**Table S1** Crystal data and structure refinement parameters for complex **1**.

---

|                                                                                      |                                                                   |
|--------------------------------------------------------------------------------------|-------------------------------------------------------------------|
| CCDC No                                                                              | 1944188                                                           |
| Formula                                                                              | C <sub>24</sub> H <sub>26</sub> CeN <sub>13</sub> O <sub>13</sub> |
| Formula weight                                                                       | 844.70                                                            |
| Radiation type                                                                       | Mo-K $\alpha$ , $\lambda = 0.71073$ Å                             |
| Crystal system                                                                       | monoclinic                                                        |
| Space group                                                                          | C2/c                                                              |
| Temperature (K)                                                                      | 298 (2)                                                           |
| <i>a</i> /Å                                                                          | 23.8474(12)                                                       |
| <i>b</i> /Å                                                                          | 9.3378(5)                                                         |
| <i>c</i> /Å                                                                          | 18.2600(16)                                                       |
| $\alpha$ /°                                                                          | 90                                                                |
| $\beta$ /°                                                                           | 126.4470(10)                                                      |
| $\gamma$ /°                                                                          | 90                                                                |
| <i>V</i> /Å <sup>3</sup>                                                             | 3270.9(4)                                                         |
| Z                                                                                    | 4                                                                 |
| <i>D</i> <sub>calc</sub> /g cm <sup>-3</sup>                                         | 1.715                                                             |
| $\mu$ /mm <sup>-1</sup>                                                              | 1.407                                                             |
| <i>F</i> <sub>000</sub>                                                              | 1692                                                              |
| $\vartheta$ range/°                                                                  | 3.09 to 28.28                                                     |
| GOF                                                                                  | 1.036                                                             |
| Limiting indices                                                                     | -29 ≤ <i>h</i> ≤ 29, -11 ≤ <i>k</i> ≤ 9, -22 ≤ <i>l</i> ≤ 22      |
| Reflection collected                                                                 | 12617                                                             |
| <i>R</i> <sub>int</sub>                                                              | 0.06                                                              |
| <i>R</i> <sub>1</sub> / <i>wR</i> <sub>2</sub> [ <i>I</i> > 2 $\sigma$ ( <i>I</i> )] | 0.039/ 0.058                                                      |
| Largest diff. peak (e/Å <sup>3</sup> ) and hole                                      | 0.65 and -0.59                                                    |

---

**Table S2** Selected bond lengths (Å) and bond angles (°) for complex **1**.

| Bond lengths, Å         |             |                         |            |                         |             |
|-------------------------|-------------|-------------------------|------------|-------------------------|-------------|
| Ce1—O2                  | 2.626 (2)   | Ce1—O1                  | 2.630 (2)  | Ce1—N2                  | 2.732(3)    |
| Ce1—O3                  | 2.733 (2)   | Ce1—O5                  | 2.646 (2)  | Ce1—N1                  | 2.768 (2)   |
| Bond angles, °          |             |                         |            |                         |             |
| O2—Ce1—O2 <sup>i</sup>  | 167.97(11)  | O2—Ce1—O1               | 128.76 (7) | O2—Ce1—O5               | 66.32 (8)   |
| O2—Ce1—O1 <sup>i</sup>  | 62.68(7)    | O1 <sup>i</sup> —Ce1—O1 | 74.11 (10) | O2 <sup>i</sup> —Ce1—O5 | 102.15 (7)  |
| O5 <sup>i</sup> —Ce1—N2 | 129.55 (8)  | O1—Ce1—N2 <sup>i</sup>  | 62.03 (8)  | O1 <sup>i</sup> —Ce1—O5 | 119.52 (7)  |
| O2—Ce1—N2 <sup>i</sup>  | 72.18 (8)   | O5—Ce1—O3 <sup>i</sup>  | 69.03 (7)  | O2—Ce1—O3 <sup>i</sup>  | 126.20 (7)  |
| O2—Ce1—O3               | 47.29 (7)   | N2—Ce1—O3 <sup>i</sup>  | 64.97 (8)  | O3 <sup>i</sup> —Ce1—O3 | 130.58 (11) |
| O1—Ce1—O3 <sup>i</sup>  | 98.69 (7)   | N2—Ce1—O3               | 160.61 (7) | O2—Ce1—N1               | 71.83 (8)   |
| O1—Ce1—O3               | 121.07 (7)  | O5—Ce1—O3               | 66.06 (7)  | O3—Ce1—N1               | 113.66 (8)  |
| O1—Ce1—N1 <sup>i</sup>  | 67.48 (7)   | O5—Ce1—N1               | 67.48 (8)  | O2—Ce1—N1 <sup>i</sup>  | 107.69 (7)  |
| O1—Ce1—N1               | 116.24 (8)  | O5—Ce1—N1 <sup>i</sup>  | 108.31 (8) | O3—Ce1—N1 <sup>i</sup>  | 64.36 (7)   |
| N2—Ce1—N1 <sup>i</sup>  | 124.17 (8)  | N2—Ce1—N1               | 59.01 (8)  | N2—Ce1—N2 <sup>i</sup>  | 103.05 (11) |
| N1—Ce1—N1 <sup>i</sup>  | 175.68 (12) | O5 <sup>i</sup> —Ce1—O5 | 48.06 (9)  | O1—Ce1—N2               | 58.40 (7)   |
| O5—Ce1—N2               | 119.98 (8)  |                         |            |                         |             |

Symmetry code: (i) -x, y, -z+1/2.

**Table S3** Selected hydrogen-bond geometry (Å, °) for complex **1**.

| <i>D</i> —H... <i>A</i> | <i>D</i> —H | H... <i>A</i> | <i>D</i> ... <i>A</i> | <i>D</i> —H... <i>A</i> |
|-------------------------|-------------|---------------|-----------------------|-------------------------|
| N3—H3...O7              | 0.84(3)     | 2.06(4)       | 2.843(5)              | 154(3)                  |
| O7—H7...O3 <sup>i</sup> | 0.89(10)    | 2.23(10)      | 3.038(5)              | 150(10)                 |

Symmetry code: (i) x, -y, z-1/2
